# Supplementary material for: COVID-19 Vaccine Acceptance among University Students and Lecturers in Different Provinces of Indonesia: A Cross-Sectional Study
Source: MDPI journal article supplement (doi:10.3390/vaccines11030683), 2023-03-17
Supplement: s1 [file s1]

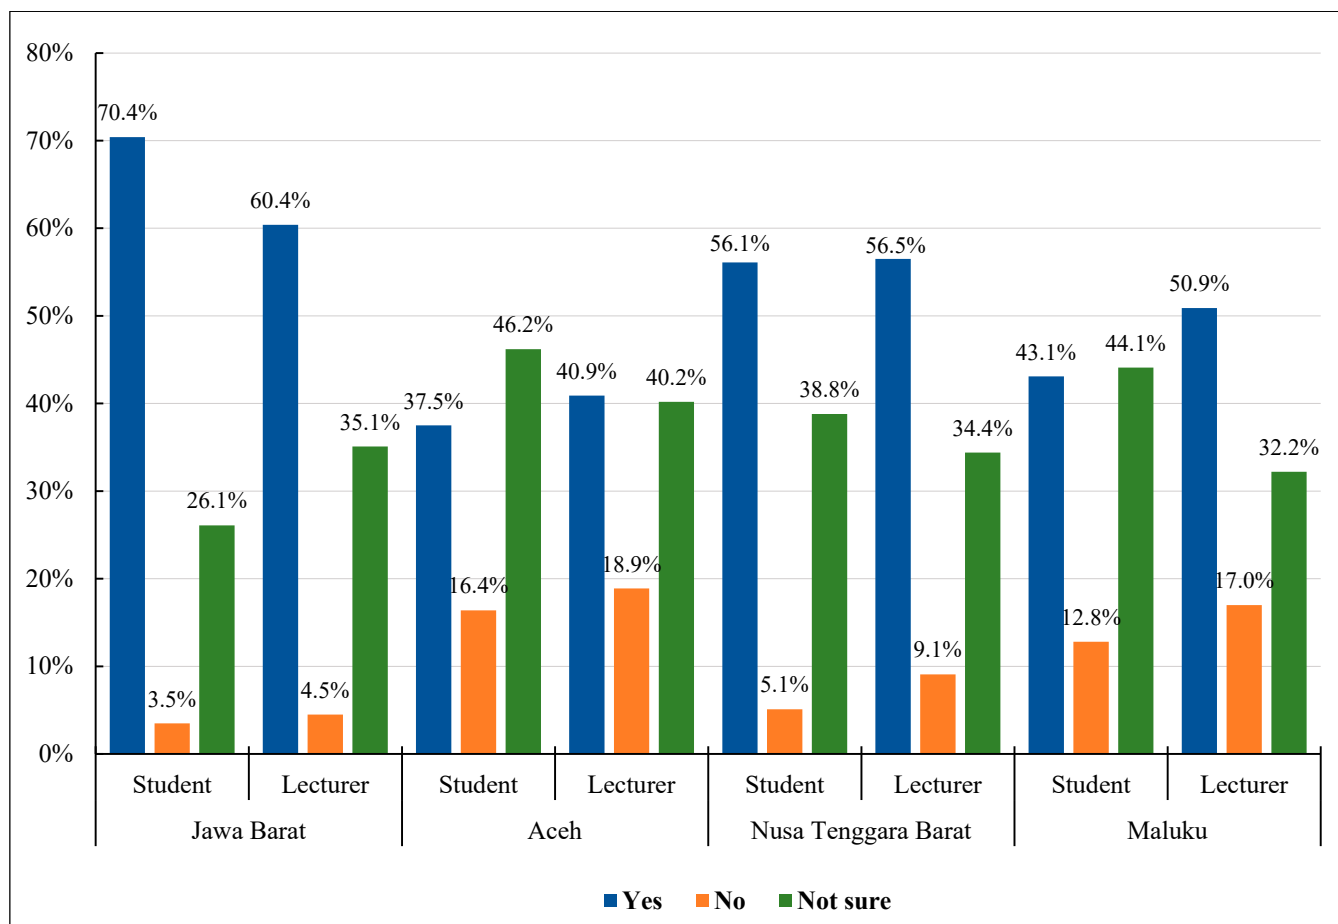

Figure S1: Bar graph showing the distribution of willingness to accept COVID-19 vaccine among students and lecturers in different provinces of Indonesia. Total number of responses: 3343

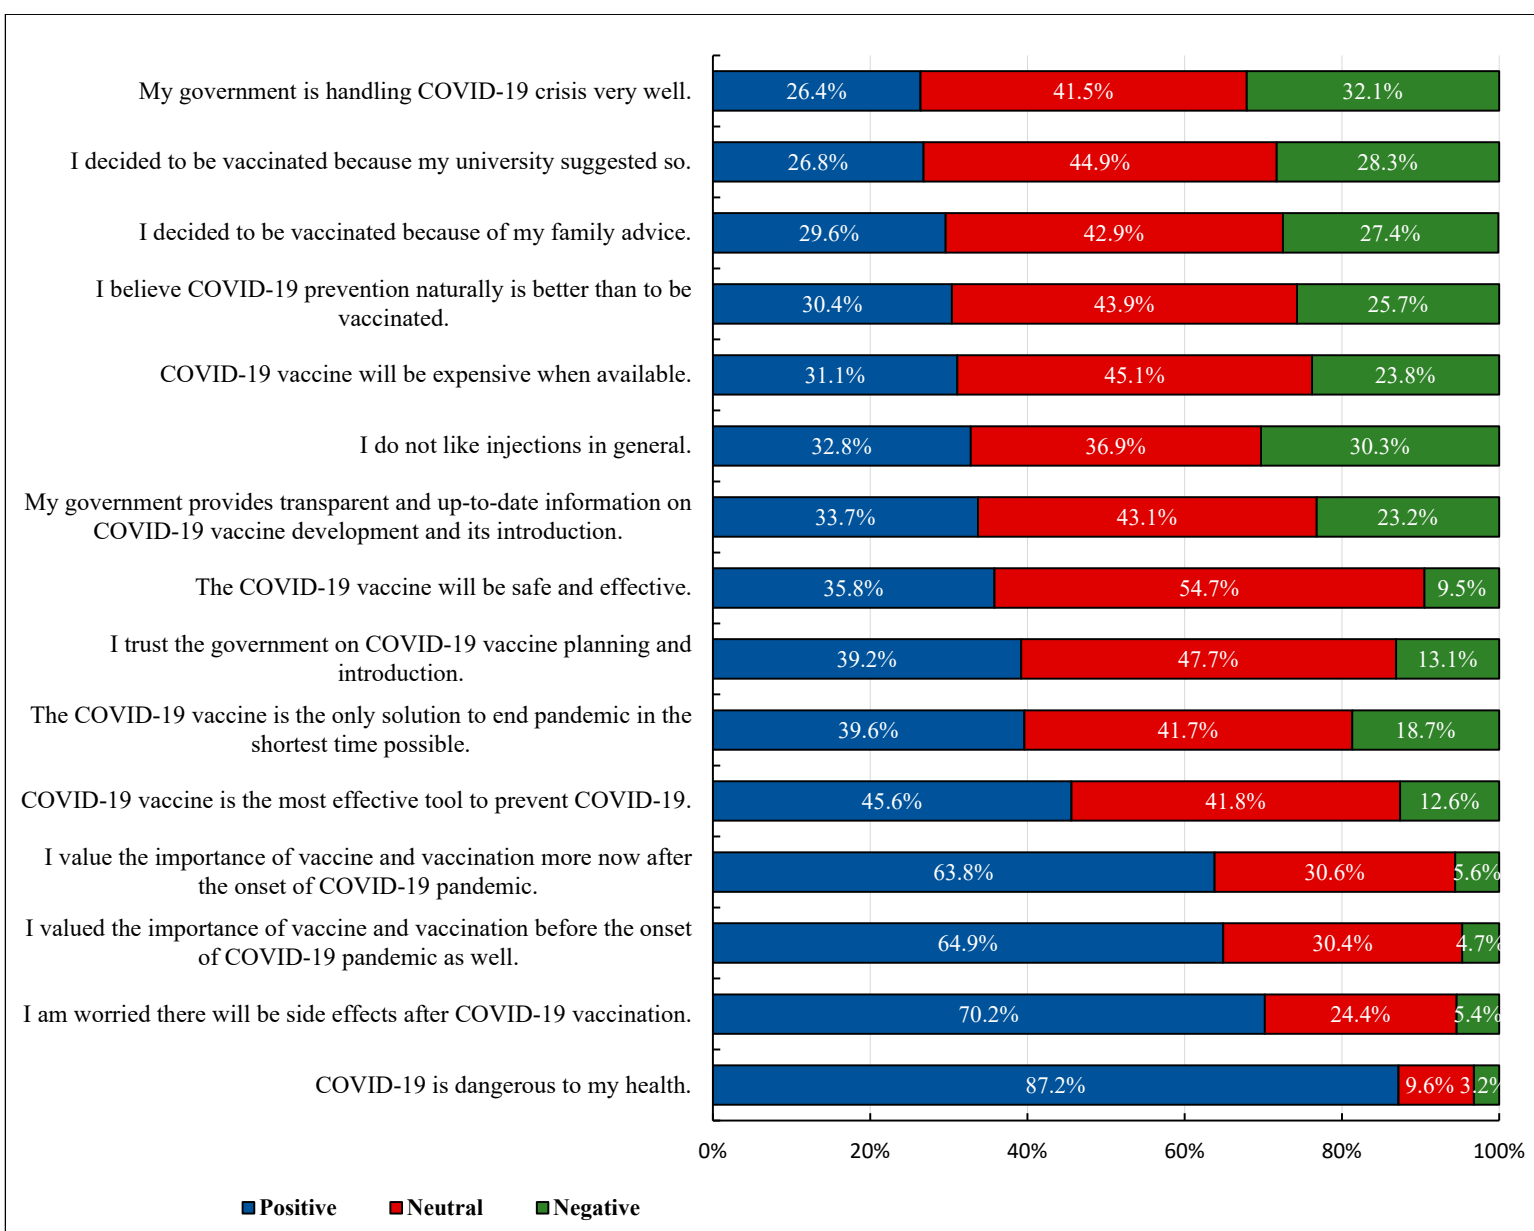

Figure S2: Bar graphs showing the level of agreement on COVID-19, COVID-19 vaccine and vaccination. Total number of responses: 3102

Table S1: Multivariate regression analysis of willingness to receive COVID-19 vaccine vs provinces and different factors influencing COVID-19 vaccine acceptance

| Characteristics                                                                                                            | Willingness to receive COVID-19 vaccine |       |             |      |
|----------------------------------------------------------------------------------------------------------------------------|-----------------------------------------|-------|-------------|------|
|                                                                                                                            | Yes vs No and Not sure                  |       |             |      |
|                                                                                                                            | p-value                                 | aO.R. | 95 C.I.     |      |
| Lower bound                                                                                                                |                                         |       | Upper bound |      |
| <b>My government is handling the crisis very well.</b>                                                                     |                                         |       |             |      |
| West Java                                                                                                                  | <0.001**                                | 1.46  | 1.34        | 1.59 |
| Aceh                                                                                                                       | <0.001**                                | 0.85  | 0.79        | 0.92 |
| West Nusa Tenggara                                                                                                         | 0.02*                                   | 1.09  | 1.01        | 1.18 |
| Maluku                                                                                                                     | <0.001**                                | 0.79  | 0.74        | 0.85 |
| <b>My government provides transparent and up-to-date information on COVID-19 vaccine development and its introduction.</b> |                                         |       |             |      |
| West Java                                                                                                                  | <0.001**                                | 1.53  | 1.40        | 1.68 |
| Aceh                                                                                                                       | 0.001**                                 | 0.86  | 0.79        | 0.94 |
| West Nusa Tenggara                                                                                                         | 0.01*                                   | 1.11  | 1.02        | 1.20 |
| Maluku                                                                                                                     | <0.001**                                | 0.75  | 0.69        | 0.81 |
| <b>I trust the government on COVID-19 vaccination planning and introduction.</b>                                           |                                         |       |             |      |
| West Java                                                                                                                  | <0.001**                                | 1.58  | 1.42        | 1.76 |
| Aceh                                                                                                                       | 0.04*                                   | 0.90  | 0.82        | 0.99 |
| West Nusa Tenggara                                                                                                         | -                                       | -     | -           | -    |
| Maluku                                                                                                                     | <0.001**                                | 0.75  | 0.68        | 0.81 |
| <b>The COVID-19 vaccine will be safe and effective.</b>                                                                    |                                         |       |             |      |
| West Java                                                                                                                  | <0.001**                                | 1.36  | 1.20        | 1.54 |
| Aceh                                                                                                                       | <0.001**                                | 0.76  | 0.67        | 0.86 |
| West Nusa Tenggara                                                                                                         | -                                       | -     | -           | -    |
| Maluku                                                                                                                     | 0.01*                                   | 0.14  | 0.03        | 0.67 |
| <b>Association with health sector</b>                                                                                      |                                         |       |             |      |
| West Java                                                                                                                  | <0.001**                                | 1.96  | 1.71        | 2.24 |
| Aceh                                                                                                                       | 0.02*                                   | 0.86  | 0.76        | 0.98 |
| West Nusa Tenggara                                                                                                         | <0.001**                                | 1.31  | 1.17        | 1.48 |
| Maluku                                                                                                                     |                                         | Ref   |             |      |

| Do you think you are at risk of contracting COVID-19? |  |          |      |      |      |
|-------------------------------------------------------|--|----------|------|------|------|
| West Java                                             |  | <0.001** | 2.01 | 1.70 | 2.37 |
| Aceh                                                  |  | <0.001** | 0.74 | 0.63 | 0.85 |
| West Nusa Tenggara                                    |  | 0.001**  | 1.25 | 1.10 | 1.43 |
| Maluku                                                |  |          | Ref  |      |      |
| Islam Religion                                        |  |          |      |      |      |
| Aceh                                                  |  | <0.001** | 0.56 | 0.46 | 0.67 |
| West Nusa Tenggara                                    |  | <0.001** | 0.32 | 0.20 | 0.50 |

Note: aOR; Odds Ratio(adjusted); 95 C.I.: 95 Confidence Interval; Ref: Reference category; p-value significant at <0.05; p-value <0.05: \*; p-value <0.005: \*\*. The above multivariate regression analysis is shown only for positive responses (Agree + Strongly Agree or Yes) with negative response (Disagree + Strongly Disagree or No) as the reference category. For provinces, all other 3 provinces are taken as reference if not indicated in the above table as reference category (Ref).
